# Supplementary material for: Inorganic-salt-induced morphological transformation and luminescent performance of GdF3 nanostructures
Source: Royal Society of Chemistry journal article supplement (doi:10.1039/c3dt33106g), 2013-01-01
Supplement: c3dt33106g.pdf [file c3dt33106g.pdf]

**Electronic Supplementary Information (ESI)**

**Inorganic-Salt-Induced Morphological Transformation and Luminescent Performance of GdF<sub>3</sub> Nanostructures**

Qi Zhao,<sup>ab</sup> Wei Lv,<sup>b</sup> Ning Guo,<sup>ab</sup> Yongchao Jia,<sup>ab</sup> Wenzhen Lv,<sup>ab</sup> Baiqi Shao,<sup>ab</sup> Mengmeng Jiao,<sup>ab</sup> and Hongpeng You<sup>\*b</sup>

<sup>a</sup> University of the Chinese Academy of Sciences, Beijing 100049, P. R. China.S

<sup>b</sup> State key Laboratory of Rare Earth Resource Utilization, Changchun Institute of Applied Chemistry, Chinese Academy of Sciences, Changchun 130022, P. R. China.

\*Corresponding author: E-mail address: [hpyou@ciac.jl.cn](mailto:hpyou@ciac.jl.cn)

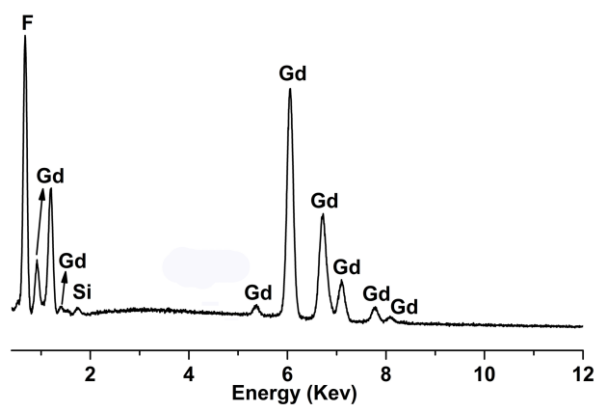

Fig. S1. The typical EDS spectrum of the  $\text{GdF}_3$  prepared with  $\text{BaCl}_2$

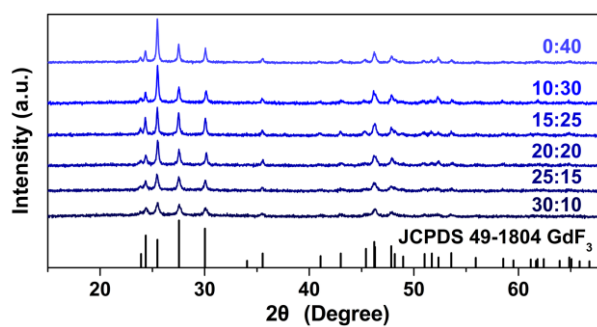

Fig. S2. XRD patterns of  $\text{GdF}_3$  prepared without  $\text{BaCl}_2$  at different EG/ $\text{H}_2\text{O}$  ratios

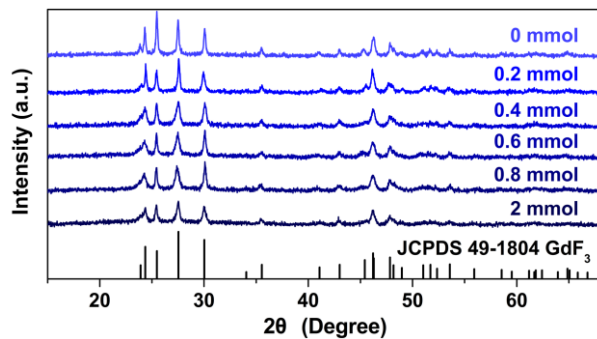

Fig. S3. XRD patterns of  $\text{GdF}_3$  obtained with different amount of  $\text{BaCl}_2$  at EG/ $\text{H}_2\text{O}$  ratio of 20/20.

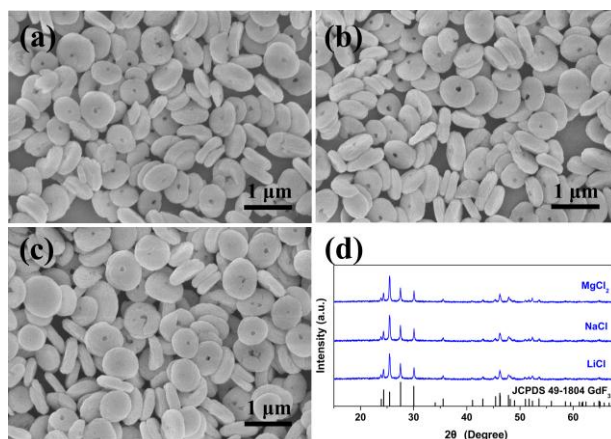

**Fig. S4.** SEM images of samples synthesized at EG/H<sub>2</sub>O ratio of 20/20 in the presence of (a) MgCl<sub>2</sub>, (b) NaCl, (c) LiCl, and (d) their corresponding XRD patterns.

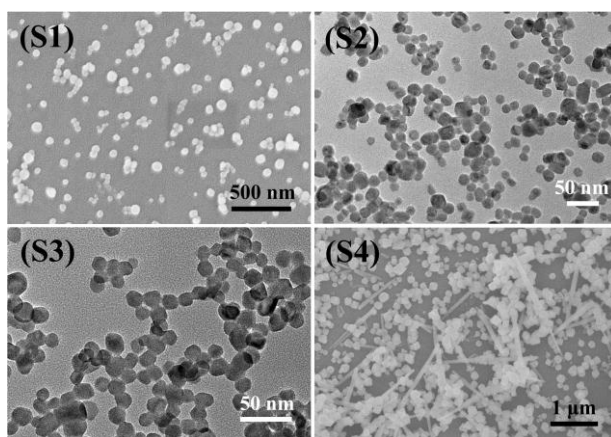

**Fig. S5.** SEM and TEM images of samples S1–S4.

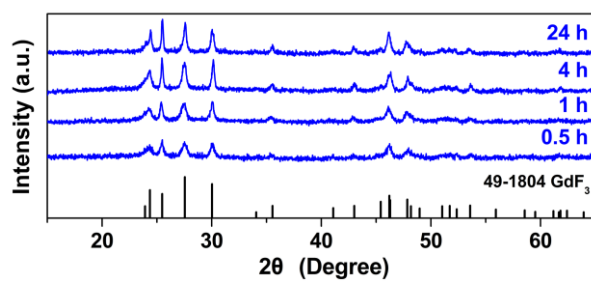

**Fig. S6.** XRD patterns of GdF<sub>3</sub> obtained at EG/H<sub>2</sub>O ratio of 20/20 reacting for different time.
